# Supplementary material
Source: publisher figshare collection journal article supplement (https://gsajournals.figshare.com/ndownloader/files/16952138)
Supplement: Supplementary file 1 [file 16952138]

## Sheet: Sheet1
Table S2. Plasmids used in this study
Plasmid	Description	Published Source
pBL230-0	POL30, TRP1, ampR, CEN/ARS	Ayyagari et al. 1995
pJR3418	CAC1, CAC2, CAC3, LEU2, ampR, 2μ	Janke et al. 2018
pJR3428	cas9, URA3, ARS4, KanR	This study, Lee et al. 2015
pRS425	LEU2, ampR, 2μ	Sikorski & Hieter 1989
